# Supplementary material
Source: PubMed Central journal article supplement (PMC3396733)
Supplement: NIHMS371679-supplement-01.pdf [file NIHMS371679-supplement-01.pdf]

**Appendix  
Table 1.****Potential Covariates in HF-ACTION Predictive Models for Primary Endpoint**

|    | <b>Variable</b>                                           |
|----|-----------------------------------------------------------|
| 1  | Age                                                       |
| 2  | Sex                                                       |
| 3  | Race                                                      |
| 4  | History of myocardial infarction                          |
| 5  | Previous revascularization                                |
| 6  | History of diabetes                                       |
| 7  | History of peripheral vascular disease                    |
| 8  | Smoking status                                            |
| 9  | History of chronic obstructive pulmonary disease          |
| 10 | Heart failure hospitalizations in the last 6 months       |
| 11 | Hospitalizations in the last 6 months                     |
| 12 | Etiology of heart failure                                 |
| 13 | NYHA class (II versus III/IV)                             |
| 14 | Canadian Cardiovascular Society angina class              |
| 15 | Baseline automatic implantable cardioverter defibrillator |
| 16 | Baseline biventricular pacemaker                          |
| 17 | Baseline pacemaker                                        |
| 18 | Atrial fibrillation/flutter                               |
| 19 | Mitral regurgitation grade by echocardiography            |
| 20 | Systolic blood pressure                                   |
| 21 | Diastolic blood pressure                                  |
| 22 | Baseline heart rate                                       |
| 23 | Body mass index                                           |
| 24 | Left ventricular ejection fraction                        |
| 25 | KCCQ: total symptom score                                 |
| 26 | KCCQ: quality of life score                               |
| 27 | KCCQ: self-efficacy score                                 |
| 28 | KCCQ: symptom stability score                             |
| 29 | KCCQ: physical limitation score                           |
| 30 | KCCQ: social limitation score                             |
| 31 | Beck Depression Index II                                  |
| 32 | Heart rate reserve on the CPX test                        |

**Appendix  
Table 1.****Potential Covariates in HF-ACTION Predictive Models for Primary Endpoint**

|    | <b>Variable</b>                                        |
|----|--------------------------------------------------------|
| 33 | Heart rate at peak exercise on the CPX test            |
| 34 | Heart rate at end of 2 <sup>nd</sup> stage of CPX test |
| 35 | Exercise duration on the CPX test                      |
| 36 | Rest echocardiography rhythm on the CPX test           |
| 37 | Peak oxygen pulse on the CPX test                      |
| 38 | Peak respiratory exchange ratio on the CPX test        |
| 39 | Ventricular conduction prior to the CPX test           |
| 40 | Ve/VCO <sub>2</sub> slope                              |
| 41 | Peak VO <sub>2</sub>                                   |
| 42 | Weber class                                            |
| 43 | Six-minute walk distance                               |
| 44 | Serum creatinine                                       |
| 45 | Sodium                                                 |
| 46 | Blood urea nitrogen                                    |
| 47 | Hemoglobin                                             |
| 48 | Treatment group (exercise vs. usual care)              |

CPX, cardiopulmonary exercise test; KCCQ, Kansas City Cardiomyopathy Questionnaire; NYHA, New York Heart Association; peak VO<sub>2</sub> = peak oxygen uptake.
